# Supplementary material for: Ecology and evolution of viruses infecting uncultivated SUP05 bacteria as revealed by single-cell- and meta-genomics
Source: eLife. 2014 Aug 29;3:e03125. doi: 10.7554/eLife.03125 (PMC4164917; doi:10.7554/eLife.03125)
Supplement: Figure 1—source data 1. — For each depth, the count of SAG where viral sequence were detected (‘infected’ SAG) is indicated, alongside the number of SAGs for which two different viruses were retrieved, the number of SAGs with CRISPR spacer detected and the number of SAGs with a defective prophage identified. DOI: http://dx.doi.org/10.7554/eLife.03125.004 [file elife03125s001.xls]

## Sheet: Sheet1
Depth (m)	Oxygen (ml/L)	Total number of SAGs	Current infections				Past infections
			Total Number / Ratio of SAGs with a viral contig	Number / Ratio of SAGs with a viral hallmark contig	Number / Ratio of SAGs with a putative viral contig	Number / Ratio of SAGs infected by 2 or more viruses	Total Number / Ratio of SAGs with a CRISPR or a defective prophage	Number / Ratio of SAGs with a CRISPR locus	Number / Ratio of SAGs with a defective prophage
100	0.9415	21	1 / 4.76%	0 / 0.00%	1 / 4.76 %	0 / 0.00%	5 / 23.81%	1 / 4.76%	4 / 19.05 %
150	0.06184	70	20 / 28.57%	8 / 11.43 %	13 / 18.57 %	1 / 1.42%	14 / 20.00%	10 / 14.29%	5 / 7.14 %
185	0.05963	45	21 / 46.67%	21 / 46.67%	2 / 4.44 %	11 / 24.44%	15 / 33.33%	14 / 31.11%	3 / 6.67 %
