# Supplementary material for: Ecology and evolution of viruses infecting uncultivated SUP05 bacteria as revealed by single-cell- and meta-genomics
Source: eLife. 2014 Aug 29;3:e03125. doi: 10.7554/eLife.03125 (PMC4164917; doi:10.7554/eLife.03125)
Supplement: Figure 2—source data 1. — For each contig, taxonomic and functional affiliation are indicated with the group or category and the number of genes affiliated to this group. The category ‘virion formation’ includes all genes associated to the formation of the capsid and the genome encapsidation. DOI: http://dx.doi.org/10.7554/eLife.03125.009 [file elife03125s002.xls]

## Sheet: Sheet1
Contig Id	Number of genes	Taxonomic affiliation		Functional affiliation
M8F6_0	68
		Puniceispirillum phage HMO 2011	14	Virion formation	5
		Other Podoviridae	2	Genome replication	6
		Other phages	10	Other viral genes	1
		Unknown	42	Putative AMGs	0
				Unknown	56
C22_13	21
		Autographivirinae	6	Virion formation	6
		Other Podoviridae	1	Genome replication	0
		Other phages	3	Othe viral genes	1
		Unknown	11	Putative AMGs	0
				Unknown	14
K04_0	58
		N4-like viruses	18	Virion formation	2
		Other phages	1	Genome replication	2
		Unknown	39	Othe viral genes	4
				Putative AMGs	1
				Unknown	49
G10_6	32
		T5-like viruses	10	Virion formation	3
		Other SIphoviridae	6	Genome replication	13
		Other phages	4	Othe viral genes	0
		Unknown	12	Putative AMGs	0
				Unknown	16
D2C1_21	8
		Microviridae	5	Virion formation	3
		Unknown	3	Genome replication	1
				Othe viral genes	1
				Putative AMGs	0
				Unknown	3
