# Supplementary material for: Ecology and evolution of viruses infecting uncultivated SUP05 bacteria as revealed by single-cell- and meta-genomics
Source: eLife. 2014 Aug 29;3:e03125. doi: 10.7554/eLife.03125 (PMC4164917; doi:10.7554/eLife.03125)
Supplement: Supplementary file 1. — List of viral sequences and defective prophages retrieved in SUP05/Arctic SAGs. Upper part of the table displays the 12 ‘SUP05 viral reference’ sequences detected from the presence of viral hallmark gene and their size greater than 15 kb or circularity (A), then the 19 SUP05 short viral contigs (B), with taxonomic affiliation based on viral hallmark genes. The bottom part displays the 19 other sequences retrieved through the second screening (C), based on the first set as references (including contigs previously detected as ‘SUP05 short viral contigs’), and the 18 other putative viral contigs (D), which affiliation to the viral kingdom is uncertain since they lack a viral hallmark gene. Estimated genome sizes are based on the size of the most closely related phage genomes, or in the case of the Microviridae on the length of the circular contigs. DOI: http://dx.doi.org/10.7554/eLife.03125.021 [file elife03125s003.xls]

## Sheet: Sheet1
Contig Id	Contig full name	Depth (m)	Contig size (bp, “o” if circular)	Number of genes	Number of viral hits	Number of hallmark genes	Taxonomic Affiliation	Putative AMG	Estimated genome size
a. Viral Reference contigs
M8F6_0	AB_755_M08F06_0	185	52692	68	26	5	Caudovirales - Podoviridae - Autographivirinae		~ 55 kb
C22_13	AB_750C22AB_904_13	150	21553	21	10	6	Caudovirales - Podoviridae - Autographivirinae		~ 35 kb
K04_0	AB_750K04AB_904_0	150	50302	58	19	2	Caudovirales - Podoviridae - N4-like virus		~ 70 kb
G10_6	AB_751_G10AB_905_6	150	27836	32	20	2	Caudovirales - Siphoviridae - Unclassified		-
B15_38	AB_754_B15AB_905_38	185	4,578 o	8	5	3	Microviridae - Gokushovirinae		4,578 bp
O20_29	AB_754_O20AB_906_29	185	4,578 o	8	5	3	Microviridae - Gokushovirinae		4,578 bp
C07_56	AB_755_C07AB_D09_56	185	4,578 o	8	5	3	Microviridae - Gokushovirinae		4,578 bp
C14_61	AB_755_C14AB_H09_61	185	4,578 o	8	5	3	Microviridae - Gokushovirinae		4,578 bp
D2C1_21	AB_755_D02C10_21	185	4,578 o	8	5	3	Microviridae - Gokushovirinae		4,578 bp
E23_63	AB_755_E23AB_A01_63	185	4,578 o	8	5	3	Microviridae - Gokushovirinae		4,578 bp
G23_32	AB_755_G23A03_32	185	4,578 o	8	5	3	Microviridae - Gokushovirinae		4,578 bp
P16_42	AB_755_P16B10_42	185	4,578 o	8	5	3	Microviridae - Gokushovirinae		4,578 bp
b. Viral short contigs
M18_38	AB_750M18AB_904_38	150	5560	6	2	2	Caudovirales - Unclassified
D05_44	AB_755_D05AB_D10_44	185	5018	4	2	1	Caudovirales - Unclassified
P07_35	AB_754_P07AB_906_35	185	2317	6	3	1	Caudovirales - Unclassified
C04_34	AB_755_C04AB_A09_34	185	7813	16	7	1	Caudovirales - Podoviridae - Unclassified
J03_13	AB_754_J03AB_906_13	185	13280	17	6	2	Caudovirales - Podoviridae - Unclassified
M18_39	AB_750M18AB_904_39	150	7208	9	4	2	Caudovirales - Podoviridae - Unclassified
E19_78	AB_755_E19AB_E12_78	185	2503	4	3	2	Caudovirales - Podoviridae - Unclassified
I18_41	AB_754_I18AB_906_41	185	2093	5	3	2	Caudovirales - Podoviridae - Unclassified
L03_51	AB_755_L03AB_D05_51	185	6215	14	6	1	Caudovirales - Podoviridae - Unclassified
P19_28	AB_755_P19AB_D10_28	185	5520	8	4	1	Caudovirales - Podoviridae - Unclassified
E19_62	AB_755_E19AB_E12_62	185	4769	4	1	1	Caudovirales - Podoviridae - Unclassified
M20_25	AB_755_M20AB_C07_25	185	4662	11	4	1	Caudovirales - Podoviridae - Unclassified
E20_51	AB_755_E20AB_F12_51	185	3721	9	4	1	Caudovirales - Podoviridae - Unclassified
J08_48	AB_751_J08AB_905_48	150	3414	7	4	1	Caudovirales - Podoviridae - Unclassified
K04_52	AB_750K04AB_904_52	150	2705	8	1	1	Caudovirales - Podoviridae - Unclassified
G16_15	AB_750G16AB_904_15	150	13051	20	6	3	Caudovirales - Siphoviridae - Unclassified	PhoH
P16_38	AB_755_P16B10_38	185	5679	6	4	2	Caudovirales - Siphoviridae - Unclassified
P16_41	AB_755_P16B10_41	185	5167	7	2	1	Caudovirales - Siphoviridae - Unclassified
L18_55	AB_751_L18AB_905_55	150	2584	3	2	1	Caudovirales - Siphoviridae - Unclassified
c. Viral reference–associated contigs						Number of hits to reference contig	Reference Sup05 vrial contig
B15_41	AB_754_B15AB_905_41	185	4265	10	1	10	M8F6_0
I19_31	AB_754_I19AB_906_31	185	5260	10	1	9	M8F6_0
C07_46	AB_755_C07AB_D09_46	185	6367	10	1	9	M8F6_0
C14_43	AB_755_C14AB_H09_43	185	10302	17	3	17	M8F6_0
D05_70	AB_755_D05AB_D10_70	185	2110	3	0	3	M8F6_0
D05_71	AB_755_D05AB_D10_71	185	2263	8	1	7	M8F6_0
D2C1_17	AB_755_D02C10_17	185	5801	12	1	11	M8F6_0
E23_46	AB_755_E23AB_A01_46	185	10836	15	1	15	M8F6_0
G23_42	AB_755_G23A03_42	185	2664	8	0	8	M8F6_0
M2D6_44	AB_755_M02D06_44	185	6557	11	1	10	M8F6_0
P16_37	AB_755_P16B10_37	185	5820	10	1	10	M8F6_0
K04_16	AB_750K04AB_904_16	150	11344	9	4	8	C22_13
K04_42	AB_750K04AB_904_42	150	4223	7	3	7	C22_13
J11_30	AB_751_J11AB_905_30	150	5221	10	7	8	G10_6
J11_34	AB_751_J11AB_905_34	150	3996	6	4	6	G10_6
I19_33	AB_754_I19AB_906_33	185	4312	8	5	6	D2C1_21
D05_72	AB_755_D05AB_D10_72	185	4310	8	5	6	D2C1_21
M02_54	AB_755_M02D06_54	185	4123	8	5	6	D2C1_21
M8F6_6	AB_755_M08F06_6	185	4582	8	5	6	D2C1_21
d. Short putative viral contigs (no hallmark gene)						Number of viral contigs in same SAG		Putative AMG
P07_26	AB_751_P07AB_905_26	150	13566	18	3			Tripartite tricarboxylate transporter TctA
M09_26	AB_747_M09AB_903_26	100	10781	13	5
M07_26	AB_751_M07AB_905_26	150	9937	16	4			Tripartite tricarboxylate transporter TctA
O20_11	AB_751_O20AB_905_11	150	9567	26	3			DsrC – 2OG-FeII Oxygenase
K10_27	AB_751_K10AB_905_27	150	9309	16	2
P22_28	AB_751_P22AB_905_28	150	8349	21	1			DsrC – 2OG-FeII Oxygenase
A03_32	AB_750A03AB_903_32	150	7999	20	2
N14_26	AB_751_N14AB_905_26	150	7535	20	1			DsrC – 2OG-FeII Oxygenase
E23_10	AB_751_E23AB_905_10	150	6472	20	1			DsrC
J11_26	AB_751_J11AB_905_26	150	5814	13	1	2
O11_45	AB_751_O11AB_905_45	150	5650	19	1			DsrC
P16_40	AB_755_P16B10_40	185	5143	14	4	4
E23_9	AB_751_E23AB_905_9	150	5065	11	1			2OG-FeII Oxygenase
E22_44	AB_751_E22AB_904_44	150	5007	17	0			DsrC
O11_50	AB_751_O11AB_905_50	150	4808	11	1			2OG-FeII Oxygenase
P07_32	AB_750P07AB_904_32	150	4692	17	0			DsrC
J03_32	AB_754_J03AB_906_32	185	4691	15	0	1
A17_39	AB_751_A17AB_904_39	150	4113	14	2
O20_10	AB_751_O20AB_905_10	150	3786	11	1
