# Supplementary material for: Ecology and evolution of viruses infecting uncultivated SUP05 bacteria as revealed by single-cell- and meta-genomics
Source: eLife. 2014 Aug 29;3:e03125. doi: 10.7554/eLife.03125 (PMC4164917; doi:10.7554/eLife.03125)
Supplement: Supplementary file 2. — List of contigs containing a putative defective prophage (A) or a CRISPR locus (B). DOI: http://dx.doi.org/10.7554/eLife.03125.022 [file elife03125s004.xls]

## Sheet: Sheet1
a.Putative defective prophage				Total number of genes	Number of genes in viral region	Ratio of uncharacterized genes in viral region	Viral region coordinates (bp)
I15_1	AB_750I15AB_904_1	150	81784	83	15	0.6	13190 – 24243
C13_0	AB_755_C13AB_G09_0	185	56523	78	12	0.5	43769 – 53220
E21_1	AB_746_E21AB_902_1	100	50636	60	25	0.8	11812 – 30534
M07_0	AB_751_M07AB_905_0	150	44379	40	25	0.5	1 – 32714
I17_0	AB_751_I17AB_905_0	150	42423	45	17	0.5	20387 – 35900
N15_5	AB_750N15AB_904_5	150	38660	50	16	0.5	11714 – 28735
P05_11	AB_746_P05AB_902_11	100	38465	39	17	0.5	18050 – 33759
C22_7	AB_754_C22AB_908_7	185	33872	40	14	0.5	20935 – 33872
F18_8	AB_747_F18AB_903_8	100	32344	40	25	0.5	7979 – 29897
C22_12	AB_754_C22AB_905_12	185	30349	36	14	0.5	14850 – 28287
O15_14	AB_746_O15AB_902_14	100	29833	33	12	0.7	1 – 9250
K18_7	AB_750K18AB_904_7	150	29129	34	12	0.5	1 – 6461
O15_18	AB_746_O15AB_902_18	100	28369	34	24	0.7	13270 – 28369
b. CRISPR loci			Number of CRISPR spacers	Other viral signal in the same SAG
F14_9	AB_747_F14AB_903_9	100	8
A23_8	AB_750A23AB_903_8	150	2
C14_0	AB_750C14AB_904_0	150	2
G15_6	AB_750G15AB_904_6	150	2
I15_1	AB_750I15AB_904_33	150	2	One defective prophage
K23_7	AB_750K23AB_904_7	150	2
M23_16	AB_750M23AB_904_16	150	2
P14_9	AB_750P14AB_904_9	150	2
B23_43	AB_751_B23AB_904_43	150	2
C09_53	AB_751_C09AB_904_53	150	2
L09_34	AB_751_L09AB_905_34	150	2
B15_48	AB_754_B15AB_905_48	185	2	Sup05 Microviridae and Podoviridae (M8F6) contigs
C22_13	AB_754_C22AB_905_13	185	2	One defective prophage
C22_ 17	AB_754_C22AB_908_17	185	2	One defective prophage
I18_30	AB_754_I18AB_906_30	185	2	One short Caudovirales contig
I19_24	AB_754_I19AB_906_24	185	2	Sup05 Microviridae and Podoviridae (M8F6) contigs
L23_32	AB_754_L23AB_906_32	185	2
A05_29	AB_755_A05D07_29	185	2
A07_14	AB_755_A07E07_14	185	2
C07_28	AB_755_C07AB_D09_28	185	2	Sup05 Microviridae and Podoviridae (M8F6) contigs
C14_71	AB_755_C14AB_H09_71	185	2	Sup05 Microviridae and Podoviridae (M8F6) contigs
D2C1_10	AB_755_D02C10_10	185	2	Sup05 Microviridae and Podoviridae (M8F6) contigs
D5D1_6	AB_755_D05AB_D10_6	185	2	Sup05 Microviridae and Podoviridae (M8F6) contigs, and one short Caudovirales contig
D23_13	AB_755_D23AB_C11_13	185	3
M8F6_4	AB_755_M08F06_4	185	2	Sup05 Microviridae and Podoviridae (M8F6) contigs, and one short Caudovirales contig
