# Supplementary material for: Ecology and evolution of viruses infecting uncultivated SUP05 bacteria as revealed by single-cell- and meta-genomics
Source: eLife. 2014 Aug 29;3:e03125. doi: 10.7554/eLife.03125 (PMC4164917; doi:10.7554/eLife.03125)
Supplement: Supplementary file 3. — Number of genes shared between contigs of Single-Amplified Genome (SAG) with a Gokushovirinae genome and the contigs of the five most closely related SAGs. For each SAG with a Gokushovirinae genome, the five SAGs displaying the most identical genes (100% amino-acid identity) are indicated. The number and ratio of identical genes is displayed for each pair of SAGs, alongside the number and ratio of genes similar but non identical (BLASTp hit with bit score greater than 50, e-value lower than 0.001, and identity percentage greater than 30%). Matching SAGs which also display a Gokushovirinae genome are noted with a star. DOI: http://dx.doi.org/10.7554/eLife.03125.023 [file elife03125s005.xls]

## Sheet: Sheet1
SAG with an identified Gokushovirinae contig	Associated SAG	SAG Affiliation	Number / Ratio of identical genes (100% amino-acid identity )	Number / Ratio of genes shared with amino-acid identity > 30%	Gokushovirinae contig in associated SAG
AB_755_C14AB_H09		SUP05_Cluster 3
	AB_750I15AB_904	SUP05_Cluster 3	370 / 43.33%	548 / 64.17%
	AB_754_P16AB_906	SUP05_Cluster 3	330 / 38.64%	422 / 49.41%
	AB_751_B23AB_904	SUP05_Cluster 3	302 / 35.36%	579 / 67.80%
	AB_755_A05D07	SUP05_Cluster 3	278 / 32.55%	499 / 58.43%
	AB_750I07AB_904	SUP05_Cluster 3	272 / 31.85%	360 / 42.15%
	AB_755_E23AB_A01	SUP05_Cluster 3	253 / 29.63%	463 / 54.22%	*
AB_755_D05AB_D10		SUP05_Cluster 3
	AB_751_B23AB_904	SUP05_Cluster 3	231 / 37.20%	415 / 66.83%
	AB_750I15AB_904	SUP05_Cluster 3	192 / 30.92%	368 / 59.26%
	AB_755_M02D06	SUP05_Cluster 3	189 / 30.43%	341 / 54.91%	*
	AB_755_A05D07	SUP05_Cluster 3	187 / 30.11%	385 / 62.00%
	AB_750F03AB_904	SUP05_Cluster 3	178 / 28.66%	285 / 45.89%
	AB_755_C07AB_D09	SUP05_Cluster 3	177 / 28.50%	308 / 49.60%	*
AB_754_I19AB_906		SUP05_Cluster 3
	AB_750I15AB_904	SUP05_Cluster 3	185 / 40.13%	324 / 70.28%
	AB_751_B23AB_904	SUP05_Cluster 3	174 / 37.74%	331 / 71.80%
	AB_755_C14AB_H09	SUP05_Cluster 3	156 / 33.84%	274 / 59.44%	*
	AB_751_I11AB_905	SUP05_Cluster 3	154 / 33.41%	287 / 62.26%
	AB_755_M02D06	SUP05_Cluster 3	151 / 32.75%	288 / 62.47%	*
	AB_754_O08AB_906	SUP05_Cluster 3	151 / 32.75%	279 / 60.52%
AB_755_P16B10		SUP05_Cluster 3
	AB_750I15AB_904	SUP05_Cluster 3	192 / 37.94%	328 / 64.82%
	AB_751_B23AB_904	SUP05_Cluster 3	177 / 34.98%	323 / 63.83%
	AB_755_M02D06	SUP05_Cluster 3	171 / 33.79%	302 / 59.68%	*
	AB_755_A05D07	SUP05_Cluster 3	162 / 32.02%	299 / 59.09%
	AB_755_C07AB_D09	SUP05_Cluster 3	147 / 29.05%	216 / 42.69%	*
	AB_754_O08AB_906	SUP05_Cluster 3	147 / 29.05%	258 / 50.99%
AB_755_M08F06		SUP05_Cluster 3
	AB_755_C14AB_H09	SUP05_Cluster 3	74 / 49.01%	84 / 55.63%	*
	AB_755_D02C10	SUP05_Cluster 3	73 / 48.34%	87 / 57.62%	*
	AB_755_E23AB_A01	SUP05_Cluster 3	59 / 39.07%	75 / 49.67%	*
	AB_755_C07AB_D09	SUP05_Cluster 3	55 / 36.42%	66 / 43.71%	*
	AB_755_M02D06	SUP05_Cluster 3	50 / 33.11%	69 / 45.70%	*
	AB_754_I19AB_906	SUP05_Cluster 3	49 / 32.45%	59 / 39.07%	*
AB_755_M02D06		SUP05_Cluster 3
	AB_751_B23AB_904	SUP05_Cluster 3	297 / 36.99%	584 / 72.73%
	AB_750I15AB_904	SUP05_Cluster 3	287 / 35.74%	515 / 64.13%
	AB_751_I11AB_905	SUP05_Cluster 3	264 / 32.88%	437 / 54.42%
	AB_754_P16AB_906	SUP05_Cluster 3	251 / 31.26%	439 / 54.67%
	AB_754_O08AB_906	SUP05_Cluster 3	250 / 31.13%	439 / 54.67%
	AB_755_C14AB_H09	SUP05_Cluster 3	249 / 31.01%	447 / 55.67%	*
AB_754_B15AB_905		SUP05_Cluster 3
	AB_750I15AB_904	SUP05_Cluster 3	167 / 38.84%	291 / 67.67%
	AB_751_B23AB_904	SUP05_Cluster 3	163 / 37.91%	293 / 68.14%
	AB_751_C09AB_904	SUP05_Cluster 3	145 / 33.72%	246 / 57.21%
	AB_755_C14AB_H09	SUP05_Cluster 3	143 / 33.26%	241 / 56.05%	*
	AB_755_M02D06	SUP05_Cluster 3	138 / 32.09%	228 / 53.02%	*
	AB_751_I11AB_905	SUP05_Cluster 3	130 / 30.23%	233 / 54.19%
AB_755_C07AB_D09		SUP05_Cluster 3
	AB_755_M02D06	SUP05_Cluster 3	216 / 36.92%	349 / 59.66%	*
	AB_751_B23AB_904	SUP05_Cluster 3	205 / 35.04%	383 / 65.47%
	AB_755_C14AB_H09	SUP05_Cluster 3	195 / 33.33%	329 / 56.24%	*
	AB_750C14AB_904	SUP05_Cluster 3	191 / 32.65%	349 / 59.66%
	AB_750I15AB_904	SUP05_Cluster 3	190 / 32.48%	365 / 62.39%
	AB_755_D05AB_D10	SUP05_Cluster 3	172 / 29.40%	305 / 52.14%	*
AB_755_G23A03		SUP05_Cluster 3
	AB_755_M02D06	SUP05_Cluster 3	98 / 33.56%	174 / 59.59%	*
	AB_755_C07AB_D09	SUP05_Cluster 3	97 / 33.22%	134 / 45.89%	*
	AB_751_B23AB_904	SUP05_Cluster 3	97 / 33.22%	167 / 57.19%
	AB_755_E23AB_A01	SUP05_Cluster 3	97 / 33.22%	147 / 50.34%	*
	AB_750I15AB_904	SUP05_Cluster 3	97 / 33.22%	196 / 67.12%
	AB_754_B15AB_905	SUP05_Cluster 3	94 / 32.19%	141 / 48.29%	*
AB_755_D02C10		SUP05_Cluster 3
	AB_751_B23AB_904	SUP05_Cluster 3	146 / 38.12%	281 / 73.37%
	AB_755_M02D06	SUP05_Cluster 3	131 / 34.20%	217 / 56.66%	*
	AB_755_E23AB_A01	SUP05_Cluster 3	129 / 33.68%	202 / 52.74%	*
	AB_750I15AB_904	SUP05_Cluster 3	121 / 31.59%	264 / 68.93%
	AB_755_C14AB_H09	SUP05_Cluster 3	119 / 31.07%	191 / 49.87%	*
	AB_754_C22AB_905	SUP05_Cluster 3	110 / 28.72%	186 / 48.56%
AB_755_E23AB_A01		SUP05_Cluster 3
	AB_751_B23AB_904	SUP05_Cluster 3	479 / 67.56%	608 / 85.75%
	AB_750I15AB_904	SUP05_Cluster 3	290 / 40.90%	526 / 74.19%
	AB_755_C14AB_H09	SUP05_Cluster 3	252 / 35.54%	456 / 64.32%	*
	AB_755_A05D07	SUP05_Cluster 3	245 / 34.56%	470 / 66.29%
	AB_755_A21A08	SUP05_Cluster 3	245 / 34.56%	379 / 53.46%
	AB_750F20AB_904	SUP05_Cluster 3	229 / 32.30%	421 / 59.38%
AB_754_O20AB_906		SUP05_Cluster 3
	AB_750I15AB_904	SUP05_Cluster 3	144 / 47.06%	240 / 78.43%
	AB_755_M02D06	SUP05_Cluster 3	125 / 40.85%	203 / 66.34%	*
	AB_755_C14AB_H09	SUP05_Cluster 3	113 / 36.93%	173 / 56.54%	*
	AB_751_B23AB_904	SUP05_Cluster 3	112 / 36.60%	223 / 72.88%
	AB_755_E23AB_A01	SUP05_Cluster 3	105 / 34.31%	179 / 58.50%	*
	AB_750K23AB_904	SUP05_Cluster 3	105 / 34.31%	198 / 64.71%
