# Supplementary material for: Ecology and evolution of viruses infecting uncultivated SUP05 bacteria as revealed by single-cell- and meta-genomics
Source: eLife. 2014 Aug 29;3:e03125. doi: 10.7554/eLife.03125 (PMC4164917; doi:10.7554/eLife.03125)
Supplement: Supplementary file 4. — List of viral sequences detected for each SUP05 SAGs with at least one viral contig or defective prophage. For the detection of viral contigs, full-length contigs are indicated by a cross (x), partial matches (short contigs matching the full-length sequence) are noted with a dash (−). For the short contigs not similar to any SUP05 viral reference sequence, the number of different contigs identified is indicated for each cell. DOI: http://dx.doi.org/10.7554/eLife.03125.024 [file elife03125s006.xls]

## Sheet: Sheet1
SAG Id	Cluster (99% id. 16S rDNA)	Depth (m)	Microviridae	Podoviridae M8F6_0	Podoviridae C22_13	Siphoviridae G10_6	Podoviridae K04_0	Other short contig		Putative viral contig(s)		CRISPR	Defective prophage
AB-747_M09AB-903	SUP05_Cluster 1	100								1
AB-747_F14AB-903	SUP05_Cluster 1	100										x
AB-746_E21AB-902	SUP05_Cluster 2	100											1
AB-746_O15AB-902	SUP05_Cluster 2	100											2
AB-746_P05AB-902	SUP05_Cluster 2	100											1
AB-747_F18AB-903	SUP05_Cluster 2	100											1
AB-750C22AB-904	SUP05_Cluster 1	150			x
AB-750K04AB-904	SUP05_Cluster 1	150			-		x	2
AB-751_G10AB-905	SUP05_Cluster 1	150				x
AB-751_J11AB-905	SUP05_Cluster 3	150				- -				1
AB-750M18AB-904	SUP05_Cluster 3	150						2
AB-751_J08AB-905	SUP05_Cluster 1	150						1
AB-750G16AB-904	SUP05_Cluster 1	150						1
AB-751_L18AB-905	SUP05_Cluster 1	150						1
AB-750P07AB-904	SUP05_Cluster 1	150								1
AB-750A03AB-903	SUP05_Cluster 3	150								1
AB-751_A17AB-904	SUP05_Cluster 1	150								1
AB-751_E22AB-904	SUP05_Cluster 1	150								1
AB-751_E23AB-905	SUP05_Cluster 1	150								2
AB-751_K10AB-905	SUP05_Cluster 1	150								1
AB-751_N14AB-905	SUP05_Cluster 1	150								1
AB-751_O11AB-905	SUP05_Cluster 1	150								2
AB-751_O20AB-905	SUP05_Cluster 1	150								2
AB-751_P22AB-905	SUP05_Cluster 1	150								1
AB-751_M07AB-905	SUP05_Cluster 3	150								1			1
AB-751_P07AB-905	SUP05_Cluster 3	150								1
AB-750A23AB-903	SUP05_Cluster 3	150										x
AB-750P14AB-904	SUP05_Cluster 1	150										x
AB-750C14AB-904	SUP05_Cluster 3	150										x
AB-750G15AB-904	SUP05_Cluster 3	150										x
AB-750K23AB-904	SUP05_Cluster 3	150										x
AB-750M23AB-904	SUP05_Cluster 3	150										x
AB-751_B23AB-904	SUP05_Cluster 3	150										x
AB-751_C09AB-904	SUP05_Cluster 3	150										x
AB-751_L09AB-905	SUP05_Cluster 3	150										x
AB-750I15AB-904	SUP05_Cluster 3	150										x	1
AB-750K18AB-904	SUP05_Cluster 1	150											1
AB-750N15AB-904	SUP05_Cluster 3	150											1
AB-751_I17AB-905	SUP05_Cluster 13	150											1
AB-754_B15AB-905	SUP05_Cluster 3	185	x	-								x
AB-755_C07D09	SUP05_Cluster 3	185	x	-								x
AB-755_C14H09	SUP05_Cluster 3	185	x	-								x
AB-755_D02C10	SUP05_Cluster 3	185	x	-								x
AB-755_E23A01	SUP05_Cluster 3	185	x	-
AB-755_G23A03	SUP05_Cluster 3	185	x	-
AB-755_P16B10	SUP05_Cluster 3	185	x	-				2		1
AB-755_M02D06	SUP05_Cluster 3	185	-	-
AB-754_I19AB-906	SUP05_Cluster 3	185	-	-								x
AB-755_D05D10	SUP05_Cluster 3	185	-	- -				1				x
AB-755_M08F06	SUP05_Cluster 3	185	-	x				1				x
AB-754_O20AB-906	SUP05_Cluster 3	185	x
AB-754_I18AB-906	SUP05_Cluster 3	185						1				x
AB-754_J03AB-906	SUP05_Cluster 39	185						1		1
AB-754_P07AB-906	SUP05_Cluster 1	185						1
AB-755_C04A09	SUP05_Cluster 1	185						1
AB-755_E19E12	SUP05_Cluster 1	185						2
AB-755_E20F12	SUP05_Cluster 1	185						1
AB-755_L03D05	SUP05_Cluster 1	185						1
AB-755_M20C07	SUP05_Cluster 1	185						1
AB-755_P19D10	SUP05_Cluster 1	185						1
AB-755_A05D07	SUP05_Cluster 3	185										x
AB-755_A07E07	SUP05_Cluster 3	185										x
AB-754_L23AB-906	SUP05_Cluster 3	185										x
AB-755_D23C11	SUP05_Cluster 1	185										x
AB-754_C22AB-905	SUP05_Cluster 3	185										x	1
AB-754_C22AB-908	SUP05_Cluster 3	185										x	1
AB-755_C13G09	SUP05_Cluster 1	185											1
