# Supplementary material for: Ecology and evolution of viruses infecting uncultivated SUP05 bacteria as revealed by single-cell- and meta-genomics
Source: eLife. 2014 Aug 29;3:e03125. doi: 10.7554/eLife.03125 (PMC4164917; doi:10.7554/eLife.03125)
Supplement: Supplementary file 5. — List of metagenomic data sets used in this study. Viral metagenomes were used for both viral contig detection and recruitment plots, whereas microbial metagenomes were only included in the recruitment plot computation. OMZ samples are highlighted in bold. DOI: http://dx.doi.org/10.7554/eLife.03125.025 [file elife03125s007.xls]

## Sheet: Sheet1
Project / Cruise / Dataset	Dataset name (full / short)	Available on / Project Id	Gene count	Depth (m)	Location of sample	Oxygen level (ml/L)		Type of sample
HiSeq-Illumina sequenced viromes
LineP
	Line P viral metagenome LP-24 station P20 10m / LP-24-P20-10-Aug09	IMG-M / 3300001711	486943	10	LineP transect			Photic
	Line P viral metagenome LP-28 station P12 10m/ LP-28-P12-10-Aug09	IMG-M / 3300001460	4173151	10	LineP transect			Photic
	Line P viral metagenome LP-29 station P12 500m / LP-29-P12-500-Aug09	IMG-M / 3300001709	180235	500	LineP transect			Aphotic
	Line P viral metagenome LP-31 station P12 2000m / LP-31-P12-2000-Aug09	IMG-M / 3300001712	851855	2000	LineP transect			Aphotic
	Line P viral metagenome LP-32 station P16 10m / LP-32-P16-10-Aug09	IMG-M / 3300001472	6446424	10	LineP transect			Photic
	Line P viral metagenome LP-35 station P16 2000m / LP-35-P16-2000-Aug09	IMG-M / 3300001710	195526	2000	LineP transect			Aphotic
	Line P viral metagenome LP-36 station P26 10m / LP-36-P26-10-Jun10	IMG-M / 3300001720	2581559	10	LineP transect			Photic
	Line P viral metagenome LP-37 station P26 500m / LP-37-P26-500-Jun10	IMG-M / 3300001731	3724990	500	LineP transect			Aphotic
	Line P viral metagenome LP-38 station P26 1000m / LP-38-P26-1000-Jun10	IMG-M / 3300001743	5579614	1000	LineP transect			Aphotic – OMZ
	Line P viral metagenome LP-39 station P26 2000m / LP-39-P26-2000-Feb10	IMG-M / 3300001714	1267023	2000	LineP transect			Aphotic
	Line P viral metagenome LP-40 station P26 10m / LP-40-P26-10-Aug10	IMG-M / 3300001589	28656675	10	LineP transect			Photic
	Line P viral metagenome LP-41 station P26 500m / LP-41-P26-500-Aug10	IMG-M / 3300001715	1369126	500	LineP transect			Aphotic
	Line P viral metagenome LP-42 station P26 1000m / LP-42-P26-1000-Aug10	IMG-M / 3300001716	1724549	1000	LineP transect			Aphotic – OMZ
	Line P viral metagenome LP-43 station P26 2000m / LP-43-P26-2000-Aug10	IMG-M / 3300001713	1002821	2000	LineP transect			Aphotic
	Line P viral metagenome LP-45 station P26 10m / LP-45-P26-10-Aug11	IMG-M / 3300001735	4377671	10	LineP transect			Photic
	Line P viral metagenome LP-46 station P26 500m / LP-46-P26-500-Jun11	IMG-M / 3300001728	3452058	500	LineP transect			Aphotic
	Line P viral metagenome LP-47 station P26 1000m / LP-47-P26-1000-Jun11	IMG-M / 3300001717	1921060	1000	LineP transect			Aphotic – OMZ
	Line P viral metagenome LP-48 station P26 2000m / LP-48-P26-2000-Jun11	IMG-M / 3300001718	2291990	2000	LineP transect			Aphotic
	Line P viral metagenome LP-50 station P26 500m / LP-50-P26-500-Aug11	IMG-M / 3300001722	2648343	500	LineP transect			Aphotic
	Line P viral metagenome LP-53 station P20 10m / LP-53-P20-10-Feb10	IMG-M / 3300001450	10015409	10	LineP transect			Photic
	Line P viral metagenome LP-54 station P20 1000m / LP-54-P20-1000-Feb10	IMG-M / 3300001721	2634528	1000	LineP transect			Aphotic – OMZ
	Line P viral metagenome LP-55 station P20 2000m / LP-55-P20-2000-Feb10	IMG-M / 3300001727	3447836	2000	LineP transect			Aphotic
Malaspina cruise samples
	Malaspina viral metagenome MSP-103 / MSP-103	IMG-M / 3300001726	3288037	4000	North Pacific Tropical			Aphotic
	Malaspina viral metagenome MSP-109 / MSP-109	IMG-M / 3300001719	2304431	4000	North Pacific Tropical			Aphotic
	Malaspina viral metagenome MSP-112 / MSP-112	IMG-M / 3300001733	4075977	4000	North Pacific Tropical			Aphotic
	Malaspina viral metagenome MSP-114 / MSP-114	IMG-M / 3300001740	5086789	Hypoxia depth	North Pacific Tropical			Aphotic – OMZ
	Malaspina viral metagenome MSP-118 / MSP-118	IMG-M / 3300001738	4644993	3100	North Pacific Equatorial			Aphotic
	Malaspina viral metagenome MSP-121 / MSP-121	IMG-M / 3300001739	4687491	4000	North Pacific Equatorial			Aphotic
	Malaspina viral metagenome MSP-131 / MSP-131	IMG-M / 3300001736	4503055	4000	North Atlantic Tropical			Aphotic
	Malaspina viral metagenome MSP-134 / MSP-134	IMG-M / 3300001730	3650808	4000	North Atlantic Tropical			Aphotic
	Malaspina viral metagenome MSP-144 / MSP-144	IMG-M / 3300001723	2753772	4000	North Atlantic Subtropical			Aphotic
	Malaspina viral metagenome MSP-146 / MSP-146	IMG-M / 3300001724	2818048	4000	North Atlantic Subtropical			Aphotic
	Malaspina viral metagenome MSP-81 / MSP-81	IMG-M / 3300001797	2662260	3500	South Pacific Ocean			Aphotic
	Malaspina viral metagenome MSP-82 / MSP-82	IMG-M / 3300001725	3092457	2150	South Pacific Subtropical			Aphotic
	Malaspina viral metagenome MSP-91 / MSP-91	IMG-M / 3300001729	3567343	4000	Pacific Equatorial			Aphotic
	Malaspina viral metagenome MSP-97 / MSP-97	IMG-M / 3300001732	3778514	4000	North Pacific Equatorial			Aphotic
HiSeq-Illumina sequenced microbial metagenomes
Saanich Inlet – LineP transect
	Line P June 2009 P20 500m / LP-P20-500-Jun09	IMG-M / 3300000266	156196	500	LineP transect		0.57	Oxygen
	Line P August 2009 P04 10m / LP-P04-10-Aug09	IMG-M / 3300000265	374373	10	LineP transect		6.5	Oxygen
	Line P sample_A_09_P04_500 / LP-P04-500-Aug09	IMG-M / 3300000264	248691	500	LineP transect		0.64	Oxygen
	Line P sample_A_09_P04_1000 / LP-P04-1000-Aug09	IMG-M / 3300000263	139796	1000	LineP transect		0.27	OMZ
	Line P sample_A_09_P04_1300 / LP-P04-1300-Aug09	IMG-M / 3300000262	267267	1300	LineP transect		0.48	OMZ
	Line P sample_A_09_P20_1000 / LP-P20-1000-Aug09	IMG-M / 3300000261	247287	1000	LineP transect		0.34	OMZ
	Line P sample_A_09_P20_500 / LP-P20-500-Aug09	IMG-M / 3300000260	288329	500	LineP transect		0.85	Oxygen
	Line P June 2008 P16 500m / LP-P16-500-Jun08	IMG-M / 3300000251	288304	500	LineP transect		0.7061	Oxygen
	Line P sample_J_09_P20_1000 / LP-P20-1000-Jun09	IMG-M / 3300000258	222571	1000	LineP transect		0.29	OMZ
	Saanich Inlet sample F_10_SI03_10 / SI-SI03-10-Feb10	IMG-M / 3300000137	324929	10	Saanich Inlet		4.19543	Oxygen
	Saanich Inlet sample_F_10_SI03_100 / LP-SI03-100-Feb10	IMG-M / 3300000257	432640	100	Saanich Inlet		1.25892	Oxygen
	Saanich Inlet sample_F_10_SI03_120 / LP-SI03-120-Feb10	IMG-M / 3300000256	405348	120	Saanich Inlet		0.178717	OMZ
	Saanich Inlet sample_F_10_SI03_135 / LP-SI03-135-Feb10	IMG-M / 3300000255	343863	135	Saanich Inlet		0.0651648	OMZ
	Saanich Inlet sample_F_10_SI03_150 / LP-SI03-150-Feb10	IMG-M / 3300000213	281044	150	Saanich Inlet		0.06426	OMZ
	Saanich Inlet sample_F_10_SI03_200 / LP-SI03-200-Feb10	IMG-M / 3300000198	320777	200	Saanich Inlet		0.0556631	OMZ
	Line P August 2008 P12 1000m / LP-P12-1000-Aug08	IMG-M / 3300000322	222678	1000	LineP transect		0.2668	OMZ
	Line P August 2008 P12 2000m / LP-P12-2000-Aug08	IMG-M / 3300000161	329063	2000	LineP transect		1.3984	Oxygen
	Line P August 2008 P20 500m / LP-P20-500-Aug08	IMG-M / 3300000183	137347	500	LineP transect		0.7567	Oxygen
	Line P June 2009 P12 10m / LP-P12-10-Jun09	IMG-M / 3300000168	139870	10	LineP transect		6.8	Oxygen
	Line P August 2008 P20 2000m / LP-P20-2000-Aug08	IMG-M / 3300000209	155635	2000	LineP transect		1.2788	Oxygen
	Line P August 2009 P16 10m / LP-P16-10-Aug09	IMG-M / 3300000149	258965	10	LineP transect		5.92	Oxygen
	Line P August 2009 P16 500m / LP-P16-500-Aug09	IMG-M / 3300000142	353145	500	LineP transect		0.9	Oxygen
	Line P August 2009 P16 2000m / LP-P16-2000-Aug09	IMG-M / 3300000196	124193	2000	LineP transect		1.24	Oxygen
	Line P August 2009 P20 2000m / LP-P20-2000-Aug09	IMG-M / 3300000323	306258	2000	LineP transect		1.26	Oxygen
	Line P February 2010 P16 500m / LP-P16-500-Feb10	IMG-M / 3300000173	148914	500	LineP transect		1.1	Oxygen
	Line P February 2010 P16 1000m / LP-P16-1000-Feb10	IMG-M / 3300000219	407359	1000	LineP transect		0.28	OMZ
	Line P February 2010 P16 2000m / LP-P16-2000-Feb10	IMG-M / 3300000186	84284	2000	LineP transect		1.28	Oxygen
	Line P June 2008 P4 500m / LP-P04-500-Jun08	IMG-M / 3300000181	276762	500	LineP transect		0.5957	Oxygen
	Line P June 2008 P4 1000m / LP-P04-1000-Jun08	IMG-M / 3300000144	48023	1000	LineP transect		0.2576	OMZ
	Line P June 2008 P4 1300m / LP-P04-1300-Jun08	IMG-M / 3300000141	268501	1300	LineP transect		0.4209	OMZ
	Line P June 2009 P16 500m / LP-P16-500-Jun09	IMG-M / 3300000179	300679	500	LineP transect		0.85	Oxygen
	Line P June 2009 P16 1000m / LP-P16-1000-Jun09	IMG-M / 3300000190	334083	1000	LineP transect		0.23	OMZ
	Line P June 2009 P16 2000m / LP-P16-2000-Jun09	IMG-M / 3300000163	304771	2000	LineP transect		1.36	Oxygen
	Line P June 2009 P20 2000m / LP-P20-2000-Jun09	IMG-M / 3300000218	108014	2000	LineP transect		1.29	Oxygen
	Line P August 2008 P26 10m / LP-P26-10-Aug08	IMG-M / 3300000159	202225	10	LineP transect		6.6378	Oxygen
	Line P August 2008 P26 500m / LP-P26-500-Aug08	IMG-M / 3300000180	51492	500	LineP transect		0.5267	Oxygen
	Line P August 2008 P26 1000m / LP-P26-1000-Aug08	IMG-M / 3300000157	284547	1000	LineP transect		0.4002	OMZ
	Line P August 2009 P26 500m / LP-P26-500-Aug09	IMG-M / 3300000247	273584	500	LineP transect		0.81	Oxygen
	Line P February 2009 P12 500m / LP-P12-500-Feb09	IMG-M / 3300000248	224976	500	LineP transect		0.94	Oxygen
	Line P February 2009 P12 1000m / LP-P12-1000-Feb09	IMG-M / 3300000249	30061	1000	LineP transect		0.28	OMZ
	Line P February 2009 P26 500m / LP-P26-500-Feb09	IMG-M / 3300000140	185008	500	LineP transect		0.8	Oxygen
	Line P February 2009 P26 1000m / LP-P26-1000-Feb09	IMG-M / 3300000250	325356	1000	LineP transect		0.41	OMZ
	Line P sample_J_08_P26_500 / LP-P26-500-Jun08	IMG-M / 3300000259	246316	500	LineP transect		0.4991	Oxygen
	Line P June 2008 P16 1000m / LP-P16-1000-Jun08	IMG-M / 3300000252	113677	1000	LineP transect		0.2737	OMZ
	Line P June 2008 P12 500m / LP-P12-500-Jun08	IMG-M / 3300000152	328814	500	LineP transect		0.7176	Oxygen
	Line P June 2008 P12 1000m / LP-P12-1000-Jun08	IMG-M / 3300000253	50779	1000	LineP transect		0.2461	OMZ
	Line P June 2008 P12 2000m / LP-P12-2000-Jun08	IMG-M / 3300000221	107203	2000	LineP transect		1.4122	Oxygen
	Line P June 2009 P12 500m / LP-P12-500-Jun09	IMG-M / 3300000222	412372	500	LineP transect		0.85	Oxygen
	Line P June 2009 P4 10m / LP-P04-10-Jun09	IMG-M / 3300000223	154103	10	LineP transect		7.32	Oxygen
	Saanich Inlet 34 06/16/09 10m / SI-SI03-10-Jun09	IMG-M / 3300000224	324195	10	Saanich Inlet		5.83441	Oxygen
	Saanich Inlet 34 06/16/09 100m / SI-SI03-100-Jun09	IMG-M / 3300000254	417199	100	Saanich Inlet		1.21815	Oxygen
	Saanich Inlet 34 06/16/09 120m / SI-SI03-120-Jun09	IMG-M / 3300000225	431738	120	Saanich Inlet		0.407282	OMZ
	Saanich Inlet 34 06/16/09 135m / SI-SI03-135-Jun09	IMG-M / 3300000226	474369	135	Saanich Inlet		0.256648	OMZ
	Saanich Inlet 34 06/16/09 150m / SI-SI03-150-Jun09	IMG-M / 3300000237	183189	150	Saanich Inlet		0.0649908	OMZ
	Saanich Inlet 34 06/16/09 200m / SI-SI03-200-Jun09	IMG-M / 3300000172	408921	200	Saanich Inlet		0.0597035	OMZ
	Saanich Inlet 36 08/11/09 100m / SI-SI03-100-Aug09	IMG-M / 3300000238	247515	100	Saanich Inlet		0.745286	Oxygen
	Saanich Inlet 36 08/11/09 120m / SI-SI03-120-Aug09	IMG-M / 3300000239	465536	120	Saanich Inlet		0.408125	OMZ
	Saanich Inlet 36 08/11/09 135m / SI-SI03-135-Aug09	IMG-M / 3300000170	288981	135	Saanich Inlet		0.385222	OMZ
	Saanich Inlet 36 08/11/09 150m / SI-SI03-150-Aug09	IMG-M / 3300000204	113296	150	Saanich Inlet		0.0833862	OMZ
	Saanich Inlet 36 08/11/09 200m / SI-SI03-200-Aug09	IMG-M / 3300000155	136765	200	Saanich Inlet		0.0596642	OMZ
	Saanich Inlet 39 11/10/09 10m / SI-SI03-10-Nov09	IMG-M / 3300000199	162852	10	Saanich Inlet		2.81634	Oxygen
	Saanich Inlet 39 11/10/09 100m / SI-SI03-100-Nov09	IMG-M / 3300000325	417861	100	Saanich Inlet		0.273922	OMZ
	Saanich Inlet 39 11/10/09 120m / SI-SI03-120-Nov09	IMG-M / 3300000167	487292	120	Saanich Inlet		0.161823	OMZ
	Saanich Inlet 39 11/10/09 135m / SI-SI03-135-Nov09	IMG-M / 3300000153	346099	135	Saanich Inlet		0.201517	OMZ
	Saanich Inlet 39 11/10/09 150m / SI-SI03-150-Nov09	IMG-M / 3300000195	170584	150	Saanich Inlet		0.0652824	OMZ
	Saanich Inlet 39 11/10/09 200m / SI-SI03-200-Nov09	IMG-M / 3300000164	393823	200	Saanich Inlet		0.0598951	OMZ
	Saanich Inlet 47 07/07/10 100m / SI-SI03-100-Jul10	IMG-M / 3300000148	293423	100	Saanich Inlet		0.722761	Oxygen
	Saanich Inlet 47 07/07/10 120m / SI-SI03-120-Jul10	IMG-M / 3300000212	350853	120	Saanich Inlet		0.0795235	OMZ
	Saanich Inlet 47 07/07/10 135m / SI-SI03-135-Jul10	IMG-M / 3300000193	367092	135	Saanich Inlet		0.0648572	OMZ
	Saanich Inlet 47 07/07/10 150m / SI-SI03-150-Jul10	IMG-M / 3300000154	355101	150	Saanich Inlet		0.0623456	OMZ
	Saanich Inlet 47 07/07/10 200m / SI-SI03-200-Jul10	IMG-M / 3300000171	215213	200	Saanich Inlet		0.0587025	OMZ
	Saanich Inlet 48 08/11/10 10m / SI-SI03-10-Aug10	IMG-M / 3300000207	143498	10	Saanich Inlet		4.58581	Oxygen
	Saanich Inlet 48 08/11/10 100m / SI-SI03-100-Aug10	IMG-M / 3300000324	392080	100	Saanich Inlet		1.66079	Oxygen
	Saanich Inlet 48 08/11/10 120m / SI-SI03-120-Aug10	IMG-M / 3300000150	233189	120	Saanich Inlet		0.0602221	OMZ
	Saanich Inlet 48 08/11/10 135m / SI-SI03-135-Aug10	IMG-M / 3300000160	283707	135	Saanich Inlet		0.0590765	OMZ
	Saanich Inlet 48 08/11/10 150m / SI-SI03-150-Aug10	IMG-M / 3300000200	157311	150	Saanich Inlet		0.0587446	OMZ
	Saanich Inlet 48 08/11/10 200m / SI-SI03-200-Aug10	IMG-M / 3300000166	106605	200	Saanich Inlet		0.0558647	OMZ
	Saanich Inlet 53 01/11/11 10m / SI-SI03-10-Jan11	IMG-M / 3300000143	38714	10	Saanich Inlet		4.74899	Oxygen
	Saanich Inlet 53 01/11/11 100m / SI-SI03-100-Jan11	IMG-M / 3300000187	296754	100	Saanich Inlet		0.568945	Oxygen
	Saanich Inlet 53 01/11/11 120m / SI-SI03-120-Jan11	IMG-M / 3300000215	331633	120	Saanich Inlet		0.0696298	OMZ
	Saanich Inlet 53 01/11/11 135m / SI-SI03-135-Jan11	IMG-M / 3300000211	214842	135	Saanich Inlet		0.0658055	OMZ
	Saanich Inlet 53 01/11/11 150m / SI-SI03-150-Jan11	IMG-M / 3300000216	404731	150	Saanich Inlet		0.0617528	OMZ
	Saanich Inlet 53 01/11/11 200m / SI-SI03-200-Jan11	IMG-M / 3300000151	309813	200	Saanich Inlet		0.0594445	OMZ
	Saanich Inlet 54 02/08/11 100m / SI-SI03-100-Feb11	IMG-M / 3300000158	329079	100	Saanich Inlet		0.711112	Oxygen
	Saanich Inlet 54 02/08/11 120m / SI-SI03-120-Feb11	IMG-M / 3300000146	176451	120	Saanich Inlet		0.100535	OMZ
	Saanich Inlet 54 02/08/11 135m / SI-SI03-135-Feb11	IMG-M / 3300000201	171695	135	Saanich Inlet		0.0887751	OMZ
	Saanich Inlet 54 02/08/11 150m / SI-SI03-150-Feb11	IMG-M / 3300000147	95744	150	Saanich Inlet		0.0831067	OMZ
	Saanich Inlet 54 02/08/11 200m / SI-SI03-200-Feb11	IMG-M / 3300000214	196182	200	Saanich Inlet		0.0715204	OMZ
	Saanich Inlet 60 08/10/11 100m / SI-SI03-100-Aug11	IMG-M / 3300000192	395612	100	Saanich Inlet		0.94447	Oxygen
	Saanich Inlet 60 08/10/11 150m / SI-SI03-150-Aug11	IMG-M / 3300000188	220220	150	Saanich Inlet		0	OMZ
	Saanich Inlet 60 08/10/11 200m / SI-SI03-200-Aug11	IMG-M / 3300000174	387064	200	Saanich Inlet		0	OMZ
454-Sequenced viromes			Reads count
OMZ Chile viromes (Cassman et al., 2013)
	OxMinZoneSite3Vir200811-10 / OMZ_In_10	MG-Rast / 4443316.3	128426	10	Eastern Tropical South Pacific			Photic
	OxMinZoneSite3Vir200806-90 / OMZ_In_90	MG-Rast / 4442219.3	361414	90	Eastern Tropical South Pacific			Aphotic – OMZ
	OxMinZoneSite3Vir200811-200 / OMZ_In_200	MG-Rast / 4443317.3	96629	200	Eastern Tropical South Pacific			Aphotic – OMZ
	OxMinZoneSite5Vir20080618-55 / OMZ_Off_55	MG-Rast / 4443776.3	226623	55	Eastern Tropical South Pacific			Photic
	OxMinZoneSite5Vir20080618-90 / OMZ_Off_90	MG-Rast / 4443777.3	300794	90	Eastern Tropical South Pacific			Aphotic – OMZ
	OxMinZoneSite5Vir200806-200 / OMZ_Off_200	MG-Rast / 4442145.3	163472	200	Eastern Tropical South Pacific			Aphotic – OMZ
Pacific Ocean Viromes dataset (Hurwitz et al., 2013)
	Great Barrier Reef, Fitzroy island / GFS	Camera / CAM_P_0000915	82739	8	South Pacific Ocean			Photic
	Great Barrier Reef, Dunk island / GDS	Camera / CAM_P_0000915	116855	9	South Pacific Ocean			Photic
	Line P P12 / LJ12S	Camera / CAM_P_0000915	92415	10	LineP transect			Photic
	Line P P12 / LJ12A	Camera / CAM_P_0000915	58108	500	LineP transect			Aphotic
	Line P P12 / LJ12O	Camera / CAM_P_0000915	122565	1000	LineP transect			Aphotic – OMZ
	Line P P12 / LJ12D	Camera / CAM_P_0000915	49914	2000	LineP transect			Aphotic
	Line P P26 / LA26S	Camera / CAM_P_0000915	165256	10	LineP transect			Photic
	Line P P26 / LA26A	Camera / CAM_P_0000915	42118	500	LineP transect			Aphotic
	Line P P26 / LA26O	Camera / CAM_P_0000915	70596	1000	LineP transect			Aphotic – OMZ
	Line P P26 / LA26D	Camera / CAM_P_0000915	68516	2000	LineP transect			Aphotic
	Line P P26 / LF26S	Camera / CAM_P_0000915	192685	10	LineP transect			Photic
	Line P P26 / LF26A	Camera / CAM_P_0000915	167616	500	LineP transect			Aphotic
	Line P P26 / LF26O	Camera / CAM_P_0000915	147537	1000	LineP transect			Aphotic – OMZ
	Line P P26 / LF26D	Camera / CAM_P_0000915	125896	2000	LineP transect			Aphotic
	Line P P26 / LJ26S	Camera / CAM_P_0000915	75036	10	LineP transect			Photic
	Line P P26 / LJ26O	Camera / CAM_P_0000915	101179	1000	LineP transect			Aphotic – OMZ
	Line P P26 / LJ26D	Camera / CAM_P_0000915	55332	2000	LineP transect			Aphotic
	Line P P04 / LJ4S	Camera / CAM_P_0000915	107244	10	LineP transect			Photic
	Line P P04 / LJ4A	Camera / CAM_P_0000915	136876	500	LineP transect			Aphotic
	Line P P04 / LJ4O	Camera / CAM_P_0000915	97126	1000	LineP transect			Aphotic – OMZ
	Line P P04 / LJ4D	Camera / CAM_P_0000915	98478	1300	LineP transect			Aphotic
	MBARI:67-155M/ 4OS	Camera / CAM_P_0000915	203238	10	North Pacific Tropical			Photic
	MBARI:67-155M/ M5OD	Camera / CAM_P_0000915	156509	105	North Pacific Tropical			Photic
	MBARI:67-155M/ M6O1K	Camera / CAM_P_0000915	225833	1000	North Pacific Tropical			Aphotic
	MBARI:67-155M/ M7O4K	Camera / CAM_P_0000915	144588	4300	North Pacific Tropical			Aphotic
	MBARI:67-70 / M2MS	Camera / CAM_P_0000915	321754	10	North Pacific Tropical			Photic
	MBARI:67-70 / M3MD	Camera / CAM_P_0000915	31528	42	North Pacific Tropical			Photic
	MBARI:H3 / M1CS	Camera / CAM_P_0000915	303519	10	North Pacific Tropical			Photic
	SIO:ScrippsPier / SFCS	Camera / CAM_P_0000914	487339	5	North Pacific Tropical			Photic
	SIO:ScrippsPier / SFDS	Camera / CAM_P_0000914	645463	5	North Pacific Tropical			Photic
	SIO:ScrippsPier / SFSS	Camera / CAM_P_0000914	504826	5	North Pacific Tropical			Photic
	SIO:ScrippsPier / STCS	Camera / CAM_P_0000914	821404	5	North Pacific Tropical			Photic
454-Sequenced microbial metagenomes
ETSP Microbial metagenome and metatranscriptome (Stewart et al., 2012)
	Moomz1 15m DNA	SRA / SRR304684	556375	15	Eastern Tropical South Pacific			Oxygen
	MOOMZ1 50m DNA	SRA / SRR064444	393403	50	Eastern Tropical South Pacific			oxygen
	MOOMZ1 50m cDNA	SRA / SRR064445	379333	50	Eastern Tropical South Pacific			Oxygen
	Moomz1 65m DNA	SRA / SRR304656	419712	65	Eastern Tropical South Pacific			Oxygen
	MOOMZ1 85m DNA	SRA / SRR064446	595662	85	Eastern Tropical South Pacific			OMZ
	MOOMZ1 85m cDNA	SRA / SRR064447	184386	85	Eastern Tropical South Pacific			OMZ
	MOOMZ1 110m DNA	SRA / SRR064448	403227	110	Eastern Tropical South Pacific			OMZ
	MOOMZ1 110m cDNA	SRA / SRR064449	557762	110	Eastern Tropical South Pacific			OMZ
	MOOMZ1 200m DNA	SRA / SRR064450	516426	200	Eastern Tropical South Pacific			OMZ
	MOOMZ1 200m cDNA	SRA / SRR064451	441273	200	Eastern Tropical South Pacific			OMZ
	Moomz1 500m DNA	SRA / SRR304668	533824	500	Eastern Tropical South Pacific			Oxygen
	Moomz1 800m DNA	SRA / SRR304683	201806	500	Eastern Tropical South Pacific			Oxygen
ETSP Microbial size-fraction metagenomes (Ganesh et al., 2012)
	Mooz 70m 0.22	SRA / SRR960580	275595	70	Eastern Tropical South Pacific
	Mooz 70m 1.6	SRA / SRR961671	163987	70	Eastern Tropical South Pacific
	Mooz 110m 0.22	SRA / SRR961673	238182	110	Eastern Tropical South Pacific
	Mooz 110m 1.6	SRA / SRR961675	142140	110	Eastern Tropical South Pacific
	Mooz 200m 0.22	SRA / SRR961676	253507	200	Eastern Tropical South Pacific
	Mooz 200m 1.6	SRA / SRR961677	204644	200	Eastern Tropical South Pacific
	Mooz 1000m 0.22	SRA / SRR961679	173089	1000	Eastern Tropical South Pacific
	Mooz 1000m 1.6	SRA / SRR961680	209778	1000	Eastern Tropical South Pacific
Hydrothermal vents Guaymas basin (Anantharaman et al., 2013)
	AJXC01	Genbank / AJXC00000000	256912	2000	Coastal Califormia
