# Supplementary material for: Ecology and evolution of viruses infecting uncultivated SUP05 bacteria as revealed by single-cell- and meta-genomics
Source: eLife. 2014 Aug 29;3:e03125. doi: 10.7554/eLife.03125 (PMC4164917; doi:10.7554/eLife.03125)
Supplement: Supplementary file 6. — List of PFAM domains detected in the 68 viral sequences identified. The four putative Auxiliary Metabolism Genes are highlighted in bold. DOI: http://dx.doi.org/10.7554/eLife.03125.026 [file elife03125s008.xls]

## Sheet: Sheet1
Protein domain category	PFAM Id	PFAM name	Detected in a viral hallmark contig	Number of detection	Domain definition
Viral cycle-associated
	PF09675.5	Chlamy_scaf	x	11	Chlamydia-phage Chp2 scaffold (Chlamy_scaf)
	PF12236.3	Head-tail_con	x	9	Bacteriophage head to tail connecting protein
	PF13392.1	HNH_3	x	1	HNH endonuclease
	PF13597.1	NRDD	x	1	Anaerobic ribonucleoside-triphosphate reductase
	PF11651.3	P22_CoatProtein	x	2	P22 coat protein - gene protein 5
	PF12705.2	PDDEXK_1	x	2	PD-(D/E)XK nuclease superfamily
	PF11962.3	Peptidase_G2	x	1	IMC autoproteolytic cleavage domain
	PF13884.1	Peptidase_S74	x	2	Chaperone of bacteriophage endosialidase
	PF04586.12	Peptidase_U35	x	2	Caudovirus prohead protease
	PF05354.6	Phage_attach	x	1	Phage Head-Tail Attachment
	PF05065.8	Phage_capsid	x	1	Phage capsid family
	PF02305.12	Phage_F	x	16	Capsid protein (F protein)
	PF04860.7	Phage_portal	x	1	Phage portal protein
	PF05136.8	Phage_portal_2	x	1	Phage portal protein, lambda family
	PF05396.6	Phage_T7_Capsid	x	1	Phage T7 capsid assembly protein
	PF13550.1	Phage-tail_3	x	1	Putative phage tail protein
	PF03592.11	Terminase_2	x	1	Terminase small subunit
	PF04466.8	Terminase_3	x	1	Phage terminase large subunit
	PF03237.10	Terminase_6	x	4	Terminase-like family
	PF05876.7	Terminase_GpA	x	1	Phage terminase large subunit (GpA)
	PF13508.1	Acetyltransf_7	x	1	Acetyltransferase (GNAT) domain
	PF01653.13	DNA_ligase_aden	x	2	NAD-dependent DNA ligase adenylation domain
	PF00145.12	DNA_methylase	x	5	C-5 cytosine-specific DNA methylase
	PF00476.15	DNA_pol_A	x	5	DNA polymerase family A
	PF03796.10	DnaB_C	x	2	DnaB-like helicase C terminal domain
	PF02945.10	Endonuclease_7	x	3	Recombination endonuclease VII
	PF00717.18	Peptidase_S24		2	Peptidase S24-like
	PF00166.16	Cpn10		7	Chaperonin 10 Kd subunit
	PF02357.14	NusG		1	Transcription termination factor nusG
	PF01380.17	SIS		1	SIS (Sugar Isomerase) domain
	PF07508.8	Recombinase		1	Recombinase
	PF00589.17	Phage_integrase		1	Phage integrase family
	PF13489.1	Methyltransf_23		1	Methyltransferase domain
	PF12847.2	Methyltransf_18		1	Methyltransferase domain
	PF03118.10	RNA_pol_A_CTD		1	Bacterial RNA polymerase, alpha chain C terminal domain
	PF01402.16	RHH_1		1	Ribbon-helix-helix protein, copG family
	PF01555.13	N6_N4_Mtase		1	DNA methyltransferase
	PF02511.10	Thy1		1	Thymidylate synthase complementing protein
	PF04851.10	ResIII	x	1	Type III restriction enzyme, res subunit
	PF02867.10	Ribonuc_red_lgC	x	7	Ribonucleotide reductase, barrel domain
	PF00268.16	Ribonuc_red_sm	x	8	Ribonucleotide reductase, small chain
	PF00940.14	RNA_pol	x	2	DNA-dependent RNA polymerase
	PF05866.6	RusA	x	5	Endodeoxyribonuclease RusA
	PF00580.16	UvrD-helicase	x	2	UvrD/REP helicase N-terminal domain
	PF01807.15	zf-CHC2	x	1	CHC2 zinc finger in DNA primase
Other enzymes
	PF04358.8	DsrC		7	Third subunit of dissimilatory sulphite reductase
	PF13759.1	2OG-FeII_Oxy_5		5	2OG-Fe(II) oxygenase
	PF01970.11	TctA		2	Tripartite tricarboxylate transporter TctA family
	PF02562.11	PhoH	x	1	Phosphate-starvation induced ATPase
Uncharacterized
	PF13479.1	AAA_24	x	2	AAA domain
	PF13604.1	AAA_30	x	2	AAA domain
	PF07728.9	AAA_5	x	1	AAA domain (dynein-related subfamily)
	PF09723.5	CxxC_CxxC_SSSS	x	1	Zinc ribbon domain
	PF13936.1	HTH_38	x	2	Helix-turn-helix domain
	PF14090.1	HTH_39	x	3	Helix-turn-helix domain
	PF13772.1	AIG2_2	x	1	AIG2-like family
	PF00533.21	BRCT	x	1	BRCA1 C Terminus domain
	PF06067.6	DUF932	x	1	Domain of unknown function (DUF932)
	PF10027.4	DUF2269	x	2	Predicted integral membrane protein (DUF2269)
	PF13203.1	DUF2201_N	x	2	Putative metallopeptidase domain
	PF11753.3	DUF3310	x	2	Protein of unknwon function (DUF3310)
	PB000988	Pfam-B_988	x	11
	PB003364	Pfam-B_3364	x	2
	PB014764	Pfam-B_14764	x	3
	PB015091	Pfam-B_15091	x	2
	PB000990	Pfam-B_990	x	1
	PB011087	Pfam-B_11087	x	1
	PB000372	Pfam-B_372	x	1
	PB000538	Pfam-B_538	x	2
	PB001168	Pfam-B_1168	x	2
	PB008412	Pfam-B_8412	x	2
	PB015178	Pfam-B_15178	x	1
	PB016211	Pfam-B_16211	x	2
	PB016839	Pfam-B_16839	x	1
	PB000890	Pfam-B_890	x	1
	PB002252	Pfam-B_2252	x	2
	PB005737	Pfam-B_5737	x	1
	PB008686	Pfam-B_8686	x	1
	PB012996	Pfam-B_12996		1
	PF07105.6	DUF1367		1	Protein of unknwon function (DUF1367)
	PF06147.6	DUF968		1	Protein of unknwon function (DUF968)
	PB010506	Pfam-B_10506	x	1
	PB018273	Pfam-B_18273	x	1
	PB019044	Pfam-B_19044	x	1
	PB019553	Pfam-B_19553	x	1
