# Supplementary material for: Ecology and evolution of viruses infecting uncultivated SUP05 bacteria as revealed by single-cell- and meta-genomics
Source: eLife. 2014 Aug 29;3:e03125. doi: 10.7554/eLife.03125 (PMC4164917; doi:10.7554/eLife.03125)
Supplement: Supplementary file 7. — Number of genes shared between contigs of Single-Amplified Genome (SAG) with a DsrC gene on a viral contig and the contigs of the five most closely related SAGs. For each SAG with a DsrC gene on a viral contig, the five SAGs displaying the most identical genes (100% amino-acid identity) are indicated. The number and ratio of identical genes is displayed for each pair of SAGs, alongside the number and ratio of genes similar but non identical (BLASTp hit with bit score greater than 50, e-value lower than 0.001, and identity percentage greater than 30%). Matching SAGs which also display a similar DsrC gene on a viral contig are indicated with a star. DOI: http://dx.doi.org/10.7554/eLife.03125.027 [file elife03125s009.xls]

## Sheet: Sheet1
SAG with an identified DsrC contig	Associated SAG	SAG Affiliation	Number / Ratio of identical genes (100% amino-acid identity )	Number / Ratio of genes shared with amino-acid identity > 30%	DsrC contig in associated SAG
AB_751_N14AB_905		SUP05_Cluster 1
	AB_751_O11AB_905	SUP05_Cluster 1	187 / 26.79%	434 / 62.18%	*
	AB_747_I05AB_903	SUP05_Cluster 9	184 / 26.36%	394 / 56.45%
	AB_750P07AB_904	SUP05_Cluster 1	182 / 26.07%	363 / 52.01%	*
	AB_750L07AB_904	SUP05_Cluster 1	178 / 25.50%	429 / 61.46%
	AB_755_C21ZAB_A10	SUP05_Cluster 1	174 / 24.93%	330 / 47.28%
	AB_755_L03AB_D05	SUP05_Cluster 1	164 / 23.50%	413 / 59.17%
AB_750P07AB_904		SUP05_Cluster 1
	AB_746_O21AB_902	SUP05_Cluster 1	276 / 37.20%	501 / 67.52%
	AB_751_G10AB_905	SUP05_Cluster 1	272 / 36.66%	341 / 45.96%
	AB_747_I05AB_903	SUP05_Cluster 9	257 / 34.64%	497 / 66.98%
	AB_755_C13AB_G09	SUP05_Cluster 1	216 / 29.11%	467 / 62.94%
	AB_751_D23AB_904	SUP05_Cluster 1	216 / 29.11%	489 / 65.90%
	AB_750L23AB_904	SUP05_Cluster 1	215 / 28.98%	385 / 51.89%
AB_751_E23AB_905		SUP05_Cluster 1
	AB_751_O11AB_905	SUP05_Cluster 1	109 / 41.60%	188 / 71.76%	*
	AB_751_O20AB_905	SUP05_Cluster 1	101 / 38.55%	119 / 45.42%	*
	AB_751_E22AB_904	SUP05_Cluster 1	100 / 38.17%	117 / 44.66%	*
	AB_751_G10AB_905	SUP05_Cluster 1	97 / 37.02%	136 / 51.91%
	AB_751_N14AB_905	SUP05_Cluster 1	92 / 35.11%	138 / 52.67%	*
	AB_751_D23AB_904	SUP05_Cluster 1	87 / 33.21%	165 / 62.98%
AB_751_O20AB_905		SUP05_Cluster 1
	AB_751_G10AB_905	SUP05_Cluster 1	148 / 40.88%	211 / 58.29%
	AB_751_E22AB_904	SUP05_Cluster 1	126 / 34.81%	176 / 48.62%	*
	AB_747_I05AB_903	SUP05_Cluster 9	125 / 34.53%	238 / 65.75%
	AB_751_N14AB_905	SUP05_Cluster 1	112 / 30.94%	193 / 53.31%	*
	AB_750L07AB_904	SUP05_Cluster 1	101 / 27.90%	233 / 64.36%
	AB_750P07AB_904	SUP05_Cluster 1	97 / 26.80%	172 / 47.51%	*
AB_751_E22AB_904		SUP05_Cluster 1
	AB_746_G10AB_902	SUP05_Cluster 1	186 / 33.39%	320 / 57.45%
	AB_751_G10AB_905	SUP05_Cluster 1	172 / 30.88%	281 / 50.45%
	AB_750P07AB_904	SUP05_Cluster 1	153 / 27.47%	265 / 47.58%	*
	AB_755_L03AB_D05	SUP05_Cluster 1	147 / 26.39%	329 / 59.07%
	AB_750L07AB_904	SUP05_Cluster 1	142 / 25.49%	326 / 58.53%
	AB_751_N14AB_905	SUP05_Cluster 1	142 / 25.49%	234 / 42.01%	*
AB_751_P22AB_905		SUP05_Cluster 1
	AB_747_I05AB_903	SUP05_Cluster 9	161 / 32.33%	310 / 62.25%
	AB_750L23AB_904	SUP05_Cluster 1	160 / 32.13%	278 / 55.82%
	AB_751_D23AB_904	SUP05_Cluster 1	158 / 31.73%	305 / 61.24%
	AB_750P07AB_904	SUP05_Cluster 1	152 / 30.52%	280 / 56.22%	*
	AB_751_N14AB_905	SUP05_Cluster 1	146 / 29.32%	261 / 52.41%	*
	AB_750L07AB_904	SUP05_Cluster 1	141 / 28.31%	308 / 61.85%
AB_751_O11AB_905		SUP05_Cluster 1
	AB_750L07AB_904	SUP05_Cluster 1	235 / 23.06%	612 / 60.06%
	AB_747_I05AB_903	SUP05_Cluster 9	217 / 21.30%	612 / 60.06%
	AB_751_G10AB_905	SUP05_Cluster 1	214 / 21.00%	410 / 40.24%
	AB_750P07AB_904	SUP05_Cluster 1	213 / 20.90%	481 / 47.20%	*
	AB_746_O21AB_902	SUP05_Cluster 1	213 / 20.90%	587 / 57.61%
	AB_751_D23AB_904	SUP05_Cluster 1	208 / 20.41%	657 / 64.47%
